# Pulled Diversification Rates, Lineage-Through-Time Plots and Modern Macroevolutionary Modelling

ANDREW J. HELMSTETTER<sup>1,\*</sup>, SYLVAIN GLEMIN<sup>2</sup>, JOS KÄFER<sup>3</sup>, ROSANA ZENIL-FERGUSON<sup>4</sup>, HERVÉ SAUQUET<sup>5,6</sup>, HUGO DE BOER<sup>7</sup>, LÉO-PAUL M. J. DAGALLIER<sup>8</sup>, NATHAN MAZET<sup>9</sup>, ELIETTE L. REBOUD<sup>9</sup>, THOMAS L. P. COUVREUR<sup>8</sup>, AND FABIEN L. CONDAMINE<sup>9</sup>

<sup>1</sup> *FONDATION POUR LA RECHERCHE SUR LA BIODIVERSITÉ - CENTRE FOR THE SYNTHESIS AND ANALYSIS OF BIODIVERSITY, 34000 MONTPELLIER, FRANCE*

<sup>2</sup> *CNRS, ECOSYSTÈMES BIODIVERSITÉ EVOLUTION (UNIVERSITÉ DE RENNES), 35000 RENNES, FRANCE*

<sup>3</sup> *UNIVERSITÉ DE LYON, UNIVERSITÉ LYON 1, CNRS, LABORATOIRE DE BIOMÉTRIE ET BIOLOGIE EVOLUTIVE UMR 5558, F-69622 VILLEURBANNE, FRANCE*

<sup>4</sup> *SCHOOL OF LIFE SCIENCES, UNIVERSITY OF HAWAII MANOA, HONOLULU, HI, 96822, USA*

<sup>5</sup> *NATIONAL HERBARIUM OF NEW SOUTH WALES, ROYAL BOTANIC GARDENS AND DOMAIN TRUST, SYDNEY, NEW SOUTH WALES, 2000, AUSTRALIA*

<sup>6</sup> *EVOLUTION AND ECOLOGY RESEARCH CENTRE, SCHOOL OF BIOLOGICAL, EARTH AND ENVIRONMENTAL SCIENCES, UNIVERSITY OF NEW SOUTH WALES, SYDNEY, AUSTRALIA*

<sup>7</sup> *NATURAL HISTORY MUSEUM, UNIVERSITY OF OSLO, 0318 OSLO, NORWAY*

<sup>8</sup> *IRD, DIADE, UNIV MONTPELLIER, MONTPELLIER, FRANCE*

<sup>9</sup> *CNRS, INSTITUT DES SCIENCES DE L'EVOLUTION DE MONTPELLIER (UNIVERSITÉ DE MONTPELLIER), 34095 MONTPELLIER, FRANCE*

*\*ANDREW J. HELMSTETTER, FRB-CESAB, MONTPELLIER, 34000, FRANCE.*

*ANDREW.J.HELMSTETTER@GMAIL.COM*

## ABSTRACT

1 Estimating time-dependent rates of speciation and extinction from dated phylogenetic  
2 trees of extant species (timetrees), and determining how and why they vary is key to  
3 understanding how ecological and evolutionary processes shape biodiversity. Due to an  
4 increasing availability of phylogenies, a growing number of process-based methods relying  
5 on the birth-death model have been developed in the last decade to address a variety of  
6 questions in macroevolution. However, this methodological progress has regularly been  
7 criticised such that one may wonder how reliable the estimations of speciation and  
8 extinction rates are. In particular, using lineage-through-time (LTT) plots, a recent study  
9 (Louca and Pennell, 2020) has shown that there are an infinite number of equally likely  
10 diversification scenarios that can generate any timetree. This has led to questioning  
11 whether or not diversification rates should be estimated at all. Here we summarize, clarify,  
12 and highlight technical considerations on recent findings regarding the capacity of models  
13 and inferences to disentangle diversification histories. Using simulations we demonstrate  
14 the characteristics of pulled diversification rates and their utility. We recognize the recent  
15 findings are a step forward in understanding the behavior of macroevolutionary modelling,  
16 but they in no way suggest we should abandon diversification modelling altogether. On the  
17 contrary, the study of macroevolution using phylogenies has never been more exciting and  
18 promising than today. We still face important limitations in regard to data availability and  
19 methodological shortcomings, but by acknowledging them we can better target our joint  
20 efforts as a scientific community.

21 *Key words:* Birth-death models, extinction, speciation, phylogenetics

INTRODUCTION

A major goal in evolutionary biology is to understand the large-scale processes that have shaped biodiversity patterns through time. One important way to investigate this is by modelling species diversification using speciation and extinction, which can vary over time and among groups. It is commonplace to find areas, or clades, in phylogenetic trees that accumulate lineages faster than others. Diversification models often aim to explain this variation in diversification patterns by associating bursts of speciation or extinction with factors such as time (Höhna et al., 2016b), lineages (Rabosky, 2014), character traits (Maddison et al., 2007), or the environment (Morlon et al., 2016).

The growing number of large phylogenetic trees that capture a significant proportion of living species provide increasing power and resolution for such studies (Jetz et al., 2012; Smith and Brown, 2018; Upham et al., 2019). Furthermore, the availability of a wide variety of methods and software (e.g. BAMM (Rabosky, 2014), -SSE models (Maddison et al., 2007), RPANDA (Morlon et al., 2016), MEDUSA (Alfaro et al., 2009)) have made diversification studies increasingly popular in the last decade. Approaches that can link diversification to a particular process or trait are among the most appealing to researchers in the field because they enable us to test long-standing hypotheses in evolutionary biology and ecology including those related to the evolution of key innovations (Silvestro et al., 2014), the colonisation of new areas (McGuire et al., 2014), the effect of elevation (Lagomarsino et al., 2016; Quintero and Jetz, 2018) and the latitudinal diversity gradient (Rolland et al., 2014; Pulido-Santacruz and Weir, 2016; Rabosky et al., 2018; Igea and Tanentzap, 2020).

A recent study (Louca and Pennell, 2020) (abbreviated to LP) demonstrates how one approach, based on lineage-through-time (LTT) plots, cannot reliably estimate rates of speciation and extinction over time using extant timetrees. LP show how results of this approach can be misleading and provide potential solutions to the issues raised by proposing new summary statistics. This publication has provoked a response from the

49 community (Morlon et al., 2020) and stimulated considerable discussion, with some going  
50 so far as to suggest that speciation and extinction cannot be estimated using phylogenetic  
51 trees (Pagel, 2020). As a result, this study has called into question the meaning of  
52 diversification rate estimates generated from any analytical framework. Here, we aim to  
53 outline the major concepts discussed in LP in an accessible way, targeting a broad  
54 audience. We then put the results and conclusions of LP into historical context and explore  
55 how the implications of this study apply to macroevolutionary modelling today.

## 56 MODELLING DIVERSIFICATION RATES

57 A typical workflow for diversification rate modelling using molecular phylogenetic  
58 trees is as follows. DNA sequence data are obtained for species in a study group, which are  
59 then used to estimate species relationships in the form of a phylogenetic tree. Typically,  
60 this phylogenetic tree contains only extant species, and it is time-calibrated using ages  
61 derived from different sources including fossils (Sauquet, 2013) (note, however, that fossils  
62 are usually only used for calibration and tree shape estimation and not incorporated in  
63 subsequent estimation of diversification rates). The output of this process is referred to as  
64 an extant timetree. Once a tree has been generated, a birth-death model is fitted to  
65 explain patterns of diversification in the tree.

66 The simplest birth-death models assume that each branch of a phylogenetic tree  
67 shares the same rate of "birth" (speciation) events, as well as "death" (extinction) events  
68 (Nee et al., 1994; Nee, 2006; Ricklefs, 2007; Morlon et al., 2011). The speciation rate (or  
69  $\lambda(t)$ ) is the rate at which lineages arise at time  $t$  (or more precisely during a small time  
70 interval,  $dt$ , between  $t$  and  $t + dt$ , formally called infinitesimal birth rate). Likewise,  
71 extinction rate (or  $\mu(t)$ ) is the rate at which lineages disappear. Under this simple  
72 framework  $\lambda$  and  $\mu$  are constant over time and the same across all clades. In addition, not  
73 all extant taxa are included in the phylogenetic tree and the percentage of lineages present  
74 is known as the sampling fraction (or  $\rho$ ). By making use of all of these parameters, a

75 birth-death model allows us to investigate whether the net diversification rate, defined as  
76  $r(t) = \lambda(t) - \mu(t)$ , has varied over time or among clades (Morlon et al., 2011; Rabosky,  
77 2014; Maliet et al., 2019; Barido-Sottani et al., 2020) and ultimately uncover the processes  
78 that have given rise to extant biodiversity in the study group.

79 A SUMMARY OF THE MAIN CONCEPTS AND FINDINGS IN LOUCA AND PENNELL (2020)

80 *The deterministic Lineage Through Time plot*

81 The approach used by LP relies on the Lineage Through Time (LTT) plot (Nee  
82 et al., 1992) (Fig. 1), which shows how extant lineages (i.e. only those existing in the  
83 present-day) accumulated over time using a phylogenetic tree. Each point in an LTT  
84 corresponds to a change in the number of lineages from the root of a phylogenetic tree at  
85  $t = 0$  to the present day at  $t = T$  (Fig. 1a). This perspective is typically used when looking  
86 at evolution from the coalescent standpoint. Alternatively, as in LP, time can be counted  
87 backwards as an age (using the symbol  $\tau = T - t$ ), starting from the present day at  $\tau = 0$   
88 until  $\tau = T$  at the origin of the clade (Fig. 1b). This approach is often used when plotting  
89 phylogenetic trees. For easier interpretation and consistency with LP, we will generally  
90 consider timescale as age, or  $\tau$ , throughout this manuscript.

91 Simply put, when a clade diversifies faster, the slope of the LTT becomes steeper,  
92 but when diversification slows, the slope of the LTT levels off. When only extant lineages  
93 are considered, as in LP, LTT plots will never exhibit a drop in total lineage diversity over  
94 time, that is, the slope will never be negative. However, this does not mean that extinction  
95 does not have an effect on the shape of the LTT (Nee, 2006). By examining the shape of  
96 the LTT plot we can begin to understand how diversification rates fluctuated over the  
97 history of a clade (Ricklefs, 2007) and develop evolutionary hypotheses on why these  
98 fluctuations occurred.

99 To study general properties of phylogenetic trees, a model of the branching process  
100 is used. Several models are available, but the birth-death model remains the most widely

101 used, and is easily interpreted (Nee, 2006). The birth-death model is a continuous-time  
102 Markov chain where at any given age ( $\tau$ ) we can calculate the probability of speciation  
103 (birth of a lineage) or extinction (death of a lineage) happening. The stochastic nature of  
104 the model means that multiple simulations will result in different histories of  
105 diversification. For stochastic models like the birth-death model we can calculate their  
106 expected value, either by averaging over multiple realisations (simulations) or by  
107 approximating it with a set of continuous equations, yielding a deterministic model. Such a  
108 model directly yields the expected value one would get by averaging over infinitely many  
109 realisations, thus it is deterministic because it is fully defined by the parameters, that is,  
110 no uncertainty from stochasticity is involved. This latter approach is taken by LP who  
111 model the birth-death process as a set of differential equations, which is advantageous  
112 because these equations can be solved analytically.

113 LP refer to an LTT generated by such models as a deterministic LTT or dLTT,  
114 which corresponds here to the expected LTT generated by trees with given speciation and  
115 extinction rates. Empirical LTTs generated using extant timetrees can be compared to  
116 model-generated dLTTs (where  $\lambda$  and  $\mu$  are known) to disentangle, on average, how  
117 speciation and extinction have influenced patterns of diversity over time. To do this, the  
118 probability of the data given the model, or the likelihood, is calculated and compared  
119 across different models to select the one that fits best. Importantly, LP showed that, when  
120  $\lambda$  and  $\mu$  are shared across the tree, the likelihood can be fully written as a function of the  
121 observed LTT and the dLTT. Typically, as the parameters of the models are modified, the  
122 likelihood will change, the model becoming more or less likely. The best-fitting model can  
123 then be selected, representing our best hypothesis for how and to what extent speciation  
124 and extinction rates varied over time.

125 *Model congruence and congruence classes*

126 One might expect that every dLTT is represented by a single model - a single set of  
127 histories or continuous functions for  $\lambda(t)$  and  $\mu(t)$  - but LP show that this is not the case.  
128 Instead, different models can produce the same dLTT. These models may have very  
129 different patterns of speciation and extinction over time, yet, if different models produce  
130 the same dLTT then they will also share the same likelihood for any given LTT. This  
131 makes it impossible to choose the model that is the best representative of the evolutionary  
132 history of the clade in question. Models that generate the same dLTT fall into the same  
133 "congruence class". These congruence classes contain an infinite number of models with  
134 different parameter values that all produce the same dLTT. LP explain that when trying to  
135 select the best model we often start with a relatively small set of allowed models that we  
136 test. An example of such a difference is whether speciation rate is fixed, or allowed to vary  
137 over time. LP suggest that instead of selecting the model closest to the true process, we are  
138 instead selecting the model closest to the congruence class that includes the true process  
139 (see Fig. 3 in LP). In extreme cases, the best fitting model could thus be further from the  
140 true process than a model with a lower likelihood, just because the former is included in  
141 the congruence class and the latter is not. However, LP concede that because we only  
142 assess a limited set of models, it is unlikely that we encounter models belonging to the  
143 same congruence class, but it is nevertheless possible. The consequence of multiple, equally  
144 likely models with different speciation and extinction rates is that these rates cannot be  
145 determined. This is a statistical phenomenon known as unidentifiability - the likelihood is  
146 the same for multiple parameter values making it impossible to choose one over another.

147 *Unidentifiability*

148 In macroevolutionary modelling we might be interested to know how both  $\lambda$  and  $\mu$   
149 have changed over time (Alfaro et al., 2009). However, the unidentifiability issue outlined  
150 above means that we would not be able to ascertain the true parameter values of the

151 models that generate our dLTTs. Another well-known example of this in macroevolution is  
152 the unidentifiability of  $\alpha$  and  $\theta$  from Ornstein-Uhlenbeck models of trait evolution (Ho and  
153 Ané, 2014). This problem is not unique to macroevolutionary models, and, in fact, stems  
154 from a basic mathematical issue Rannala (2002); Ponciano et al. (2012).

155 Consider a simple example of the concept in which we want to determine the  
156 parameter values for  $x$  and  $y$ . For each value of  $x$  in equation 0.1 below, we can find a  $y$   
157 that satisfies this equation - and there are an infinite number of equally likely possibilities.  
158 It is only when we add more information (in the form of equation 0.2) that we can  
159 determine the unique pair of values for  $x$  and  $y$ . Put simply, a solution can be found only if  
160 you possess at least the same number of equations as unknowns. In this case the  
161 unidentifiability is caused by overparameterization - there is an excess of parameters such  
162 that the model cannot estimate the values of any of them.

$$2x + y = 7 \tag{0.1}$$

163

$$3x + 2y = 12 \tag{0.2}$$

164 Though the LTT is generated through the use of many different observations and  
165 elements (DNA, fossils for time-calibration, extant species sampling) it is represented by a  
166 single curve made up of one observation at any given point in time that represents the  
167 number of lineages in a clade (Fig. 1). Fitting a model to an LTT is like fitting two  
168 parameters ( $\lambda$  and  $\mu$ ) for the slope ( $\lambda - \mu$ ), which gives you only one value. This problem  
169 has been highlighted previously (Nee, 2006), where  $\lambda - \mu$  is the net diversification rate. If  
170 we try to estimate  $\lambda$  and  $\mu$  separately we find it very difficult (Fig. 2a,b) but we are much  
171 more precise when estimating  $\lambda - \mu$  (Fig. 2c). Estimates of  $\lambda$  and  $\mu$  are highly correlated  
172 (see MCMC analyses, Fig. 2d) and we find a flat surface in the likelihood where different  
173 pairs of values for  $\lambda$  and  $\mu$  are equally likely (Fig. 2e), signifying unidentifiability.

174 This issue of unidentifiability means that for any  $\lambda$  there exists a  $\mu$  that yields the



175 same dLTT. However, as LP show, if the rates vary over time, it is possible to choose  
176 almost any function for  $\lambda(t)$ , and obtain a function  $\mu(t)$  that produces the same dLTT. So,  
177 LP go beyond the classical unidentifiability issues for the parameters of a given model (as  
178 in the example above) and extend it to the space of models itself. For example, using a  
179 very large angiosperm phylogenetic tree (Smith and Brown, 2018), LP showed that the  
180 observed LTT is congruent with two opposing scenarios (Fig. 2 in LP): either a continuous  
181 increase or a continuous decline in both speciation and extinction rates through time  
182 (though the resulting diversification rates of these two scenarios are very similar).  
183 Therefore, if we observe a rapid increase in the number of lineages in our LTT (assuming  
184 complete sampling) we cannot determine if it was caused by a decrease in extinction rate,  
185 or an increase in speciation rate. If we want to use models to explain LTTs then our  
186 variables are inadequate and we must look towards other possible solutions.

### 187 *Pulled rates and their interpretation*

188 A consequence of using extant timetrees is that LTT plots will likely underestimate  
189 the number of lineages at any given time because our trees are missing species (Silvestro  
190 et al., 2018). Species can be missing for two reasons: (1) they went extinct or (2) they were  
191 not sampled. However, these two factors will have differing effects on the LTT and our  
192 estimates of diversification rates. The idea that extinction can affect estimates of diversity  
193 when using data from only extant species may seem counter-intuitive, but a marked effect  
194 has been shown (Nee, 2006). Extinction must occur in the past. Lineages that originated  
195 recently have had less time to go extinct (Nee et al., 1994; Ricklefs, 2007), so the effect of  
196 extinction on our estimates using only extant species is reduced towards the present. This  
197 leads to an increase in the rate of lineage accumulation towards the present, as the effect of  
198 extinction decreases, which occurs even when rates are constant, as seen in Figure 3f.  
199 Conversely, incomplete sampling of a group occurs up to the present day and more  
200 strongly affects the recent history (Phillimore and Price, 2008), as the deeper nodes in the

201 phylogeny can be reconstructed with only a few species. The relative importance of  
202 extinction and sampling completeness will influence whether the PSR departs from  $\lambda$  more  
203 in the past or in the present. In summary, the presence of extinction will cause us to  
204 underestimate speciation rate further in the past, because the number of extinct species  
205 increases as we consider more time, while incomplete sampling will lead to underestimates  
206 of speciation rates that are more recent (Ricklefs, 2007).

207 LP bring these two ideas together and define the 'pulled' speciation rate (PSR or  
208  $\lambda_p$ ) i.e. the speciation rate modified by extinction and sampling fraction. At a given time,  
209 PSR is the estimated speciation rate multiplied by 1 minus the probability that a lineage is  
210 missing from the tree due to extinction or incomplete sampling,  $E$ . We will not go into  
211 details regarding the calculation of  $E$  here, but further information can be found in  
212 supplementary materials of LP. PSR is shown in the following equation

$$\lambda_p(\tau) = \lambda(\tau)(1 - E(\tau)) \quad (0.3)$$

213 So, if all species are in the tree and there is no extinction (i.e. the probability of  
214 missing lineages, or  $E$ , is 0) then the PSR is equal to the (un-pulled) speciation rate. Any  
215 increase in extinction rate or the number of unsampled lineages (i.e.  $E > 0$ ) will cause PSR  
216 to drop, or be 'pulled', below speciation rate (Figs. 2,4). The lower the extinction rate and  
217 the higher the sampling fraction, the closer the estimates of PSRs will be to speciation  
218 rate. The effect of a shift in speciation rate on PSR is demonstrated in Figure 4.

219 Similarly, LP also present pulled diversification rate (PDR or  $r_p$ ). This parameter is  
220 similar to the net diversification rate ( $\lambda - \mu$ ) but, as above, is modified by another term.  
221 This new term is the relative ( $\frac{1}{\lambda}$ ) rate of change in speciation rate over time ( $\frac{d\lambda}{d\tau}$ ). This  
222 causes the pulled diversification rate to lag behind the unpulled rate. The PDR can be  
223 represented by the following equation :

$$r_p = \lambda - \mu + \frac{1}{\lambda} \cdot \frac{d\lambda}{d\tau} \quad (0.4)$$

224 The perspective in which time is viewed is critical when interpreting PDR. When  
225 reading time backwards (using  $\tau$ ) diversification decreases from present ( $\tau = 0$ ) to the past  
226 and PDR does so faster than expected (plus sign in equation (0.4)), going "too far" before  
227 stabilizing to the ancestral value. The first part of this equation is the net diversification  
228 rate,  $\lambda - \mu$ , which is thus corrected by a 'pull' corresponding to the rate of change of the  
229 speciation rate. The 'pull' of PDR is actually a delay in the response of this parameter  
230 when compared to diversification rate. This is in contrast to the 'pull' of PSR, which refers  
231 to a reduction in the estimated value of PSR relative to  $\lambda$ . This has some unexpected  
232 consequences if speciation rate rapidly increases as the PDR will rapidly decrease before  
233 starting to increase (Fig. 5a) as speciation rate stabilises. We note that LP also defined a  
234 pulled extinction rate, (PER or  $\mu_p$ ), which is similar to PDR and we do not go into details  
235 about its calculation here (see LP, Louca et al. (2018) for further details).

236 The difference between the true diversification rate and an estimated PDR can be  
237 likened to a race between an amateur and a professional race car driver. The professional  
238 driver, representing the true diversification rate in our analogy, hits the apex of each  
239 corner, going smoothly around a racetrack until the finish line. The amateur, representing  
240 PDR, will eventually arrive at the finish line, but may exceed track limits a few times  
241 when doing so because of their poor reactions. However, if the track is simply a straight  
242 line both will perform equally well. This is because the PDR is equal to the diversification  
243 rate ( $r = \lambda - \mu$ ) whenever  $\lambda$  is constant in time ( $\frac{d\lambda}{d\tau} = 0$ ), but differs from  $r$  when  $\lambda$  varies  
244 with time (see Technical considerations below for more details).

245 LP show mathematically that there is only one of each pulled rates (PSR, PDR,  
246 PER) per congruence class. These pulled rates are useful because a single congruence class  
247 can be represented by a single set of pulled rates, rather than the infinite number of  
248 possibilities of speciation and extinction rates. This is because pulled rates are compound  
249 parameters that are, as shown in Louca et al. (2018), constructed from the LTT, using its  
250 slope and the rate of change of the slope (curvature). LP show that these are related to  $\lambda$

251 and  $\mu$ : each pulled rate depends on both speciation and extinction. The shape of the dLTT  
252 plot is fully determined by any two of the rates, and the remaining rate can be calculated  
253 from the other two.

254 With these new variables we can begin to ask questions such as: has diversification  
255 been constant over time? Pulled rates can be estimated using many commonly used models  
256 of diversification (Louca and Pennell, 2020). The PSR is the speciation rate one would get  
257 by constraining extinction to be 0 and assuming complete species sampling. For PDR this  
258 involves making the speciation rate time-independent (i.e. speciation rate is constant over  
259 time). In summary, PSR provides information about how speciation rate changes over time  
260 while taking into account past extinction and the proportion of lineages sampled. PDR  
261 provides a slightly delayed estimate of  $r$  with extreme responses to rapid changes in  $\lambda$ .  
262 While the PSR can be very different from the underlying speciation and extinction rates,  
263 the PDR is close to the net diversification rate as long as speciation rate does not change  
264 too rapidly. A scenario with multiple, extremely rapid changes over a short time scale (e.g.  
265 Fig. 5d) may be biologically possible, but from an empirical point of view one would not fit  
266 models with many changes in small time intervals.

## 267 TECHNICAL CONSIDERATIONS

268 *How continuously can speciation and extinction rates vary?*

269 In their approach LP consider speciation and extinction to be a continuous property  
270 of a species, which can have instantaneous values at any time. When speciation and  
271 extinction are modelled as continuous processes, a change in the rates is immediately  
272 visible in the dLTT plot. In real trees, however, we can only observe discrete events: either  
273 a branch splits, goes extinct, or it continues. When working with a large phylogenetic tree  
274 and many species, the LTT is smooth and the slope and curvature, which are necessary for  
275 the estimation of the pulled rates, can be reliably estimated. However, many studies  
276 attempt to estimate diversification rates with relatively small numbers of species (e.g.

277 <1000). When the tree used is small, the LTT plot resembles an irregular staircase, and  
278 although one can calculate the slope by using sufficiently large time intervals, the  
279 calculation of the curvature will be less reliable. So, one should not forget that allowing for  
280 continuous rate variation is less applicable in those cases where the number of species  
281 considered is small. The consequence of this is that rate variation can be difficult to detect  
282 using birth-death models, particularly in small phylogenetic trees (Condamine et al., 2019).

283 In practice (with a limited number of species), what precision is reasonable to aim  
284 for in the characterization of variation in diversification rate? Considering step-wise  
285 changes, a straightforward limit is the total number of speciation events in a tree with  $n$   
286 extant species, which is in  $n - 1$  speciation events. Above this limit some changes will not  
287 be detectable because the number of parameters will exceed the number of observations.  
288 Another limit concerns the speed of change, which is applicable even if the number of  
289 parameters is limited. For example, consider sinusoidal variations with frequency  $f$ , where  
290 only one parameter is to be inferred. Noting that the number of speciation events per unit  
291 time is  $\lambda n$ , this sets an upper limit to  $f$  that can be detectable with the data. This also  
292 shows that rapid changes are more difficult to infer as  $n$  decreases and highlights the  
293 limitations of inferring pulled rates (or any rates inferred using continuous approximation)  
294 with small phylogenetic trees. A reasonable approach is thus to consider relatively simple,  
295 but biologically meaningful, scenarios without implausibly rapid rate variations. If so,  $r_p$   
296 will be (often very) close to  $r$ .

297 *The delay in PDR is a result of the lag time between extinction and speciation*

298 Consider a simple case with no extinction ( $\mu = 0$ ) so that changes in  $r$  that only  
299 come from changes in  $\lambda$ . If so,  $r = \lambda$  but  $r_p$  is not exactly  $\lambda$  because of temporal variations  
300 in  $\lambda$  (the term  $\frac{1}{\lambda} \cdot \frac{d\lambda}{dt}$  in equation (0.4)). LP suggest that "the pulled diversification rate can  
301 be interpreted as the effective net diversification rate if  $\lambda$  was time-independent". In our  
302 example, this means replacing a scenario where  $\mu$  is constant (at 0) and  $\lambda$  varies with a

303 scenario where  $\lambda$  is constant and  $\mu$  varies. LP explain this from the point of view of holding  
304 speciation rate constant and using extinction rate to account for changes in diversification  
305 rate. To get the same changes in the LTT using changes in  $\mu$  instead of changes in  $\lambda$   
306 (which is kept constant by construct), a delay is needed to wait for species to arise, before  
307 they can go extinct. The difficulty with this, as initially noted by Nee et al. (1992), is that  
308 there is a slight delay between the effect of speciation and the effect of extinction.

309 As mentioned previously, lineages that originated more recently have had less time  
310 to go extinct. In a constant birth-death process, this is only visible in recent history: the  
311 slope of the LTT is  $r = \lambda - \mu$  during most of the past but increases to  $\lambda$  for very recent  
312 times where the stationary behaviour has not yet been reached. However, this phenomenon  
313 is not unique to very recent times - it will also occur whenever there is a change in  
314 speciation rate. Ultimately, this is the cause of the difference between PDR and  $r$ . For  
315 example, a massive increase in the number of lineages caused by a burst of speciation  
316 means that many new lineages become available to go extinct over a short time period.  
317 However, the rate of extinction is still determined by how many lineages there were prior  
318 to the burst. As time continues, these numerous new species will begin to go extinct,  
319 meaning that extinction rate will increase to "catch up" to speciation rate and reach a new  
320 stationary point. This effect is stronger when  $\lambda$  varies rapidly (i.e. high  $\frac{1}{\lambda} \cdot \frac{d\lambda}{d\tau}$ ). Conversely,  
321 speciation cannot occur in a lineage after it has gone extinct, so there is no similar lag  
322 caused by changes in extinction rate. This is also why variation in extinction rate would  
323 not cause PDR to deviate from  $r$  (Fig. 5b).

324

## DISCUSSION

325 A recent study by Morlon et al. (2020) presents an alternative point of view that  
326 opposes the conclusions in LP. They focus on how a hypothesis-based framework allows us  
327 to overcome many of the issues that are raised in LP. Indeed, we are limiting our set of  
328 models to be tested to only those that represent our hypotheses about the factors shaping

329 diversification in a given group. We are not often interested in determining the precise  
330 values of speciation and extinction rate but rather how different diversification scenarios  
331 summarised by models containing  $\lambda$  and  $\mu$  explain patterns in a phylogenetic tree. The  
332 criticisms put forward by Morlon et al. (2020) will stimulate important discussion about  
333 key points that must be considered when using diversification models. We extend this  
334 discussion by highlighting several key points that must be considered in addition.

### 335 *Uses and limitations of LTTs*

336 LTTs are a simplistic way to visualize and summarise a time-calibrated  
337 phylogenetic tree, ignoring information related to branch lengths, tree topology and extinct  
338 species (Morlon et al., 2011). However, under the assumption of  $\lambda$  and  $\mu$  being shared  
339 across all species LP showed that the LTT contains the complete information about the  
340 underlying branching process (See also Lambert and Stadler (2013)). This simplicity  
341 provided the opportunity for LP to show mathematically how LTTs can lead to  
342 misinterpretation. However, these issues are not new to macroevolutionary biology. A  
343 review by Nee (2006) clearly demonstrated how an LTT may change when extinction is  
344 present alongside speciation (birth-death), as opposed to speciation alone (pure-birth),  
345 summarising theory from previous work (Nee et al., 1992, 1994; Harvey et al., 1994). If the  
346 growth of an extant timetree is represented as an LTT on a semi-log scale (i.e. lineage  
347 number is logarithmic, time is not, see Fig. 1) we would expect the trend to be linear  
348 under a pure birth process (with constant speciation and no extinction). If extinction is  
349 introduced then the LTT would deviate from this linearity. When both rates are constant  
350 and greater than 0, the curve is expected to be linear over most of its history, but as time  
351 reaches the present the rate of lineage accumulation will increase (i.e. the LTT slope will  
352 become steeper), as shown in Figure 3a. With no prior knowledge of the parameters, this  
353 could be because of increasing speciation rate towards the present (Fig. 3b), instead of  
354 decreasing effect of extinction (Fig. 3). It is important to keep in mind that we are dealing

355 with a phylogenetic tree made up of entirely extant species. The unobserved branches of  
356 species that went extinct (and are therefore not in the extant timetree) do not contribute  
357 to the LTT, making the estimated lineage accumulation rate lower in the past (or 'pulling'  
358 it down). Nee et al. (1994) highlighted this issue 20 years ago in the context of models  
359 where diversification rates were constant over time and now LP have provided an  
360 important extension of this idea to models that allow for rates to vary through time. The  
361 well-known limitations of LTTs for inferring speciation and extinction rates have continued  
362 to be addressed in other studies (Ricklefs, 2007; Vamosi et al., 2018; Rabosky and Lovette,  
363 2008; Crisp and Cook, 2009) since Nee et al. (1994), most recently in LP. This begs the  
364 question: what other previously proposed ideas remain hidden in the literature that could  
365 be useful to macroevolutionary modelling?

366 *Diversification rates vary among clades*

367 The conclusions of LP imply that we can test hypotheses about whether  
368 diversification rates deviate from constancy over time using pulled rates. We would be  
369 unable to pin this on changes in speciation or extinction rate, but would get a sense of how  
370 variable diversification has been. This would be useful for testing whether diversification in  
371 particular clades has remained constant or been subject to large shifts in diversification  
372 (e.g. mass extinctions) but not when diversification rate has shifted in a subclade (e.g. due  
373 to the evolution of a key innovation). The first use of pulled rates was in Louca et al.  
374 (2018), where they studied bacterial diversification, stating "*Our findings suggest that,*  
375 *during the past 1 billion years, global bacterial speciation and extinction rates were not*  
376 *substantially affected during the mass extinction events seen in eukaryotic fossil records.*"  
377 This might suggest that nothing particularly extraordinary happened in the  
378 macroevolutionary dynamics of bacteria in the last billion years. However, it is important  
379 to note that the models used in Louca et al. (2018) (and Louca and Pennell (2020)) do not  
380 allow rates to vary among clades. The rates estimated using such clade-homogeneous



381 models will correspond to the average rates over time in the entire study group, therefore  
382 missing out on any variation among clades - for example any difference in diversification  
383 rates between those species that use terrestrial vs marine environments (Louca et al.,  
384 2018). Given the importance of subclades in driving inferred diversification patterns (see  
385 (Morlon et al., 2011; Rabosky, 2020)), this may mean that we miss out on important and  
386 interesting dynamics when using pulled rates. Louca et al. (2018) touch on this point  
387 themselves: "*It is possible that diversification within individual bacterial clades may have*  
388 *been influenced by eukaryotic radiations and extinctions, and that these cases are*  
389 *overshadowed when considering all bacteria together.*" Given the diversity of life on Earth,  
390 it is unrealistic to assume that major events would have had the same effect on all lineages  
391 of a large, cosmopolitan clade, with vast amounts of genetic, morphological and ecological  
392 variation. The same criticism could be levelled at LP's use of a large phylogenetic tree of  
393 angiosperms (Smith and Brown, 2018) that contains more than 65,000 of the roughly  
394 300,000 known species, ranging from small ephemeral plants like *Arabidopsis thaliana* to  
395 gigantic, long-lived trees such as *Eucalyptus regnans*. Furthermore, a large amount of  
396 research has shown that diversification rates have varied significantly among  
397 flowering-plant clades (e.g. (O'Meara et al., 2016; Igea et al., 2017; Vamosi et al., 2018;  
398 Onstein, 2019; Soltis et al., 2019; Zenil-Ferguson et al., 2019; Magallón et al., 2019)).

399 Fortunately, the assumption of homogeneous rates among clades is not common in  
400 modern approaches. For instance, Bayesian Analysis of Macroevolutionary Mixtures  
401 (BAMM) (Rabosky, 2014) is one of several methods (Alfaro et al., 2009; Morlon et al.,  
402 2016; Höhna et al., 2016a; Maliet et al., 2019; Barido-Sottani et al., 2020) that relaxes the  
403 assumption that all lineages share the same evolutionary rates at a given point in time  
404 (Rabosky, 2017). This is a key difference from the models used by LP because it allows  
405 lineages to differ in their rates of speciation and extinction. With BAMM, the entire  
406 phylogeny could be described using a model similar to what is used in Louca and Pennell  
407 (2020), or alternatively, it could be described using multiple processes that explain rates of

408 diversification on different parts of the tree. These non-homogeneous diversification rates  
409 may help to alleviate the unidentifiability issues demonstrated by LP by taking into  
410 account additional information included in tree topology and branch lengths.

411 Another model commonly used to estimate and compare diversification rates among  
412 clades is the Binary-State Speciation and Extinction (BiSSE) model (Maddison et al.,  
413 2007), part of a family of models known as the state-dependent models of diversification  
414 (-SSE models (Ng and Smith, 2014; O’Meara and Beaulieu, 2016; Beaulieu and O’Meara,  
415 2016; Caetano et al., 2018)). These models are extensions of the birth-death model that  
416 also include information about character states of extant species. They estimate ancestral  
417 states at each node of the phylogenetic tree, as well as rates of transition between  
418 character states. LP state that the likelihood functions of SSE models are too complex to  
419 be addressed in their manuscript, but suggest that the same problems they uncover  
420 probably still apply. The increased complexity of likelihood calculations LP refer to is  
421 because BiSSE makes use of the full tree topology (Maddison et al., 2007), rather than just  
422 the timing of branching events as in the LTT (Nee et al., 1994). LP further suggest that it  
423 remains unclear how the dependence on character states (which, if removed, collapses  
424 equations in BiSSE to those shown in Nee et al. (1994)) affects the unidentifiability issue  
425 they raise. In the original BiSSE paper (Maddison et al., 2007), two important and  
426 relevant assumptions were made:

- 427 1. Sampling fraction is assumed to be 100%
- 428 2. Speciation, extinction and transition rate are constant per character state.

429 These may allow the BiSSE model to overcome (or pre-empt) some of the problems  
430 raised by LP. LP show that  $\lambda$  equals PSR when sampling fraction is 100% and  $\mu = 0$ . The  
431 first of these was assumed in the original BiSSE model, though it has since been relaxed  
432 (FitzJohn et al., 2009). Extinction can easily be set to 0 in these models, which satisfies  
433 the second BiSSE assumption and allows estimation of  $\lambda$ . Similarly, PDR equals  $r$  when  $\lambda$   
434 is constant, also an assumption in BiSSE. As a result, it appears that BiSSE models

435 estimate rates of per-character state diversification that are similar or even analogous to  
436 pulled rates and may therefore be identifiable. Researchers using SSE models have noticed  
437 that estimated speciation and extinction rates are often correlated within states and  
438 therefore usually report net diversification rates. They also are often aware that the  
439 diversification rate might vary over time, and that the whole diversification history cannot  
440 be entirely captured in one value (or two values). LP's results suggest, however, that this is  
441 a rather robust approach: as the time-dependent variation in speciation and extinction  
442 rates cannot be uncovered reliably, one should consider the estimated diversification rate  
443 as a "pulled" rate. Nevertheless, we stress that the likelihood of time-dependent  
444 diversification models (as in LP) is not the same as the likelihood of state-dependent  
445 diversification models (-SSE models) and what is unidentifiable in the former does not say  
446 anything about identifiability in the latter.

447         It is unclear how lineage-dependent rates would affect model congruence, and how  
448 the additional information included when using models such as BiSSE and BAMM would  
449 affect the unidentifiability issues. However, what is clear is that the issues raised in LP  
450 cannot be readily applied to commonly used macroevolutionary approaches without  
451 further work to show that criticisms related to LTT-based approaches are applicable to  
452 these more complex models. Alternatively, even if unidentifiability issues remain in such  
453 models they may not be relevant in the questions the models were built to answer, for  
454 example those models that test for variation in diversification rates in association with  
455 particular clades or traits. In cases like these, it is not the precise values of rates that are  
456 important but instead whether rates in one group of lineages are higher than another.

457         Perhaps most importantly, this means that we should not forego building models  
458 that estimate diversification rates because one, simplistic approach has problems, but  
459 instead continue to improve them and build upon the work done in LP. A case in point is  
460 the issue of null model choice when using SSE models raised by Rabosky and Goldberg  
461 (2015). This criticism spurred on innovation that led to the development of models with

462 hidden states (Beaulieu and O’Meara, 2016), which are now present in various new  
463 incarnations, e.g. (Caetano et al., 2018; Herrera-Alsina et al., 2019), of the SSE approach.

464 *Pulled rates are difficult to interpret*

465 LP compared the usefulness of pulled rates to effective population size ( $N_e$ ) in  
466 population genetics. Like  $N_e$ , diversification rates and pulled diversification rates are not  
467 real - they do not exist in nature. Instead their role is to help us interpret complex  
468 processes like diversification, and if they do not do this, then they lack utility.  $N_e$  can be  
469 broadly defined as the number of breeding individuals in an idealised population (e.g.  
470 constant size, random mating) that would be able to explain the summary statistics in an  
471 observed population.  $N_e$  is fairly intuitive and will react to biological phenomena in  
472 expected ways (e.g. under population structure (Whitlock and Barton, 1997) or  
473 non-random mating (Caballero and Hill, 1992)).

474 LP state that the variables they introduce are "easily interpretable". Their  
475 terminology, however, is not completely consistent nor coherent with more traditional uses,  
476 which can cause confusion. Given that  $r = \lambda - \mu$  one might intuitively think that  
477  $r_p = \lambda_p - \mu_p$  but this is not the case - pulled rates are simply different ways of summarising  
478 congruence classes and each one is calculated using both speciation and extinction rates.  
479 PSR is reasonably intuitive, though given that extinction is also included it is more similar  
480 to a diversification rate than a speciation rate. Indeed, the PSR is defined as the slope of  
481 the LTT plot (Louca et al., 2018) (see Fig. 3f, 4f), which corresponds to the diversification  
482 rate in times far enough before present, and, in the case all extant species are included, to  
483 the speciation rate at present (Nee et al., 1992).

484 PDR, however, is much more difficult to interpret, perhaps initially because the  
485 'pull' of PSR is not the same as the 'pull' of PDR. Whereas PSR decreases in value  
486 relative to  $\lambda$ , PDR is delayed in time relative to  $r$  (Fig. 5) and could better be termed as  
487 'delayed' rather than 'pulled'. We simulated a variety of diversification scenarios from

488 simple to more complex (Fig. 5) and show that PDR and  $r$  are similar in each case.  
489 However, PDR is not as intuitive as  $r$  or  $N_e$  - for example, drastic increases in  $r$  can lead  
490 to sharp decreases in PDR (Fig. 5a). The inverted pattern PDR presents in this case would  
491 make it challenging to present in a clear and concise way. Given the added difficulty of its  
492 interpretation we question whether PDR provides us with a more useful estimate of the  
493 process of diversification than an estimate of  $r$ .

494 However, compared to other pulled rates, PDR could be especially useful, not as an  
495 effective parameter, like  $N_e$ , but as a reasonable approximation of the true  $r$ . Indeed, we  
496 noted above that when shifts in  $\lambda$  are not too strong nor too rapid, PDR is close to  $r$  (Fig.  
497 4). Under non-parametric scenarios, trying to biologically interpret fine-grain variations in  
498 PDR would certainly lead to spurious conclusions. However, changes in PDR at a large  
499 scale are good proxies for large scale variation in  $r$ . This is clearly illustrated in Figure 4a  
500 where the main trend of the PDR is a recent increase in diversification, and in Figure 4d  
501 where the main trend is the stability of diversification.

502 Pulled rates can be estimated using only the shape of the LTT plot, without any  
503 further information, i.e. they are non-parametric estimates that do not suffer from the  
504 unidentifiability problems outlined previously. However, they cannot be directly  
505 interpreted in biologically meaningful terms; to estimate rates that are meaningful (e.g.  $\lambda$ ,  
506  $\mu$  &  $r$ ), one needs to make further assumptions such as constant rates of speciation and  
507 extinction over time.

#### 508 *On the use of models*

509 The discussion sparked by Louca and Pennell (2020) highlights an important issue:  
510 evolutionary biologists should be interested in the actual history of diversification of the  
511 clades they study, and the framework developed by Louca et al. (2018) shows how to do  
512 this using the shape of the LTT plot, without making strong assumptions about past  
513 speciation and extinction rates. This is classical knowledge, as we have argued; the slope of

514 the LTT plot and variations therein contain information about the diversification history  
515 of the clade. Much of the debate, however, focuses on the ability to recover a "true" history  
516 of diversification. Indeed, the goal of a scientific study should be to find out what really  
517 happened, but it becomes confusing if one considers a simulated birth-death process as the  
518 "true" history. This birth-death process is determined by two parameters ( $\lambda$  and  $\mu$ ) that  
519 can vary over time. These parameters are supposed to correspond to the rate that a lineage  
520 splits into two lineages, or goes extinct. In reality, however, a species doesn't have a  
521 speciation and an extinction rate in the same way it has a geographic distribution and a  
522 population size. These rates only make sense when they are averaged over a number of  
523 species and a certain amount of evolutionary time. That is, they are descriptive statistics  
524 summarizing much more complex processes that are playing at the level of species, and  
525 that would eventually lead to speciation or extinction. Louca and Pennell (2020)  
526 convincingly show that one cannot estimate these statistics reliably from LTT plots, and  
527 propose statistics that can be estimated more reliably. That these alternative statistics do  
528 not exactly correspond to the parameters of the naive birth-death process is not a  
529 problem; the birth-death process is only a model of diversification, and not the truth about  
530 diversification itself. The framework built by Louca et al. (2018) and LP allows us to use  
531 the LTT to test whether the diversification rate was constant or not. If a researcher wants  
532 to know how speciation and extinction actually changed to give rise to this diversification  
533 history, they will have to use other methods.

534

## CONCLUSION

535 Louca and Pennell (2020) have pointed out key issues with how we approach  
536 macroevolutionary modelling, namely the inability to distinguish historical diversification  
537 scenarios under certain circumstances. Their formalization of the unidentifiability issues in  
538 LTT-based models is an important step forward that provides us with the mathematical  
539 tools to study the associated issues further. LP highlights the avenues we must consider

540 and develop upon to ensure we do not make similar mistakes in the future. Whether  
541 variations in diversification rate are due to changes in speciation or extinction is certainly  
542 an interesting avenue of research, but LP have shown that exploring this would require  
543 much more than just fitting a model with speciation and extinction rates to an LTT.  
544 Indeed, more recent diversification models go beyond this by making use of additional  
545 information that the LTT lacks. Awareness and consideration of potential unidentifiability  
546 issues is important for macroevolutionary biologists going forward when they employ such  
547 models of diversification. However, it is important to note that LP does not show that  
548 speciation and extinction cannot be estimated with evolutionary trees (Pagel, 2020).  
549 Instead, they show that when using extant timetrees with a single, LTT-based approach,  
550 unidentifiability issues are encountered in the estimation of speciation and extinction rates,  
551 and that these problems can be circumvented by making use of pulled rates. Further work  
552 is needed to identify the extent to which the issues raised in LP apply to the more complex  
553 models of diversification used today. In the meantime it is important that the field  
554 continues to grow by using and building upon modern macroevolutionary methods, albeit  
555 with a critical eye.

556

#### ACKNOWLEDGEMENTS

557

558

559

560

561

562

563

This article was initially conceived from discussions held with the Macroevolution in Montpellier (MiM) group. We thank Stilianos Louca for comments on an earlier version of this manuscript. We also thank Marcos Mendez, Sally Otto, Dan Schoen, Jürg Schönenberger and the rest of the DiveRS group for comments and discussion throughout. TLPC is supported by funding from the European Research Council (ERC) under the European Union’s Horizon 2020 research and innovation program (grant agreement No. 865787).

564

#### SUPPLEMENTARY MATERIAL

565

566

Code associated with this manuscript is available from [http://github.com/ajhelmstetter/pulled\\_rates](http://github.com/ajhelmstetter/pulled_rates)



567

REFERENCES

- 568 Alfaro, M. E., F. Santini, C. Brock, H. Alamillo, A. Dornburg, D. L. Rabosky,  
569 G. Carnevale, and L. J. Harmon, 2009. Nine exceptional radiations plus high turnover  
570 explain species diversity in jawed vertebrates. *Proceedings of the National Academy of*  
571 *Sciences* 106:13410–13414. Publisher: National Academy of Sciences Section: Biological  
572 Sciences.
- 573 Barido-Sottani, J., T. G. Vaughan, and T. Stadler, 2020. A Multitype Birth–Death Model  
574 for Bayesian Inference of Lineage-Specific Birth and Death Rates. *Systematic Biology*  
575 69:973–986. Publisher: Oxford Academic.
- 576 Beaulieu, J. M. and M. J. Donoghue, 2013. Fruit Evolution and Diversification in  
577 Campanulid Angiosperms. *Evolution* 67:3132–3144. eprint:  
578 <https://onlinelibrary.wiley.com/doi/pdf/10.1111/evo.12180>.
- 579 Beaulieu, J. M. and B. C. O’Meara, 2016. Detecting Hidden Diversification Shifts in  
580 Models of Trait-Dependent Speciation and Extinction. *Systematic Biology* 65:583–601.
- 581 Caballero, A. and W. G. Hill, 1992. Effective size of nonrandom mating populations.  
582 *Genetics* 130:909–916. Publisher: Genetics Section: INVESTIGATIONS.
- 583 Caetano, D. S., B. C. O’Meara, and J. M. Beaulieu, 2018. Hidden state models improve  
584 state-dependent diversification approaches, including biogeographical models: HMM  
585 AND THE ADEQUACY OF SSE MODELS. *Evolution* 72:2308–2324.
- 586 Condamine, F. L., N. S. Nagalingum, C. R. Marshall, and H. Morlon, 2015. Origin and  
587 diversification of living cycads: a cautionary tale on the impact of the branching process  
588 prior in Bayesian molecular dating. *BMC Evolutionary Biology* 15:65.
- 589 Condamine, F. L., J. Rolland, and H. Morlon, 2019. Assessing the causes of diversification  
590 slowdowns: temperature-dependent and diversity-dependent models receive equivalent

- 591 support. *Ecology Letters* 22:1900–1912. .eprint:  
592 <https://onlinelibrary.wiley.com/doi/pdf/10.1111/ele.13382>.
- 593 Crisp, M. D. and L. G. Cook, 2009. Explosive Radiation or Cryptic Mass Extinction?  
594 Interpreting Signatures in Molecular Phylogenies. *Evolution* 63:2257–2265. .eprint:  
595 <https://onlinelibrary.wiley.com/doi/pdf/10.1111/j.1558-5646.2009.00728.x>.
- 596 FitzJohn, R. G., W. P. Maddison, and S. P. Otto, 2009. Estimating Trait-Dependent  
597 Speciation and Extinction Rates from Incompletely Resolved Phylogenies. *Systematic*  
598 *Biology* 58:595–611.
- 599 Harvey, P. H., R. M. May, and S. Nee, 1994. Phylogenies Without Fossils. *Evolution*  
600 48:523–529. .eprint:  
601 <https://onlinelibrary.wiley.com/doi/pdf/10.1111/j.1558-5646.1994.tb01341.x>.
- 602 Herrera-Alsina, L., P. van Els, and R. S. Etienne, 2019. Detecting the Dependence of  
603 Diversification on Multiple Traits from Phylogenetic Trees and Trait Data. *Systematic*  
604 *Biology* 68:317–328.
- 605 Ho, L. S. T. and C. Ané, 2014. Intrinsic inference difficulties for trait evolution with  
606 Ornstein-Uhlenbeck models. *Methods in Ecology and Evolution* 5:1133–1146. .eprint:  
607 <https://besjournals.onlinelibrary.wiley.com/doi/pdf/10.1111/2041-210X.12285>.
- 608 Höhna, S., M. J. Landis, T. A. Heath, B. Boussau, N. Lartillot, B. R. Moore, J. P.  
609 Huelsenbeck, and F. Ronquist, 2016a. RevBayes: Bayesian Phylogenetic Inference Using  
610 Graphical Models and an Interactive Model-Specification Language. *Systematic Biology*  
611 65:726–736.
- 612 Höhna, S., M. R. May, and B. R. Moore, 2016b. TESS: an R package for efficiently  
613 simulating phylogenetic trees and performing Bayesian inference of lineage  
614 diversification rates. *Bioinformatics* 32:789–791. Publisher: Oxford Academic.

- 615 Igea, J., E. F. Miller, A. S. T. Papadopulos, and A. J. Tanentzap, 2017. Seed size and its  
616 rate of evolution correlate with species diversification across angiosperms. *PLOS Biology*  
617 15:e2002792.
- 618 Igea, J. and A. J. Tanentzap, 2020. Angiosperm speciation cools down in the tropics.  
619 *Ecology Letters* 23:692–700. Preprint:  
620 <https://onlinelibrary.wiley.com/doi/pdf/10.1111/ele.13476>.
- 621 Jetz, W., G. H. Thomas, J. B. Joy, K. Hartmann, and A. O. Mooers, 2012. The global  
622 diversity of birds in space and time. *Nature* 491:444–448.
- 623 Lagomarsino, L. P., F. L. Condamine, A. Antonelli, A. Mulch, and C. C. Davis, 2016. The  
624 abiotic and biotic drivers of rapid diversification in Andean bellflowers (Campanulaceae).  
625 *New Phytologist* 210:1430–1442.
- 626 Lambert, A. and T. Stadler, 2013. Birth–death models and coalescent point processes: The  
627 shape and probability of reconstructed phylogenies. *Theoretical Population Biology*  
628 90:113–128.
- 629 Louca, S. and M. W. Pennell, 2020. Extant timetrees are consistent with a myriad of  
630 diversification histories. *Nature* 580:502–505.
- 631 Louca, S., P. M. Shih, M. W. Pennell, W. W. Fischer, L. W. Parfrey, and M. Doebeli,  
632 2018. Bacterial diversification through geological time. *Nature Ecology & Evolution*  
633 2:1458–1467.
- 634 Maddison, W. P., P. E. Midford, and S. P. Otto, 2007. Estimating a Binary Character’s  
635 Effect on Speciation and Extinction. *Systematic Biology* 56:701–710.
- 636 Magallón, S., L. L. Sánchez-Reyes, and S. L. Gómez-Acevedo, 2019. Thirty clues to the  
637 exceptional diversification of flowering plants. *Annals of Botany* 123:491–503. Publisher:  
638 Oxford Academic.

- 639 Maliet, O., F. Hartig, and H. Morlon, 2019. A model with many small shifts for estimating  
640 species-specific diversification rates. *Nature Ecology & Evolution* 3:1086–1092.
- 641 McGuire, J., C. Witt, J. V. Remsen, A. Corl, D. Rabosky, D. Altshuler, and R. Dudley,  
642 2014. Molecular Phylogenetics and the Diversification of Hummingbirds. *Current*  
643 *Biology* 24:910–916.
- 644 Morlon, H., F. Hartig, and S. Robin, 2020. Prior hypotheses or regularization allow  
645 inference of diversification histories from extant timetrees. *bioRxiv* P. 2020.07.03.185074.
- 646 Morlon, H., E. Lewitus, F. L. Condamine, M. Manceau, J. Clavel, and J. Drury, 2016.  
647 RPANDA: an R package for macroevolutionary analyses on phylogenetic trees. *Methods*  
648 *in Ecology and Evolution* 7:589–597.
- 649 Morlon, H., T. L. Parsons, and J. B. Plotkin, 2011. Reconciling molecular phylogenies with  
650 the fossil record. *Proceedings of the National Academy of Sciences* 108:16327–16332.
- 651 Nee, S., 2006. Birth-Death Models in Macroevolution. *Annual Review of Ecology,*  
652 *Evolution, and Systematics* 37:1–17.
- 653 Nee, S., R. M. May, and P. H. Harvey, 1994. The Reconstructed Evolutionary Process.  
654 *Philosophical Transactions: Biological Sciences* 344:305–311.
- 655 Nee, S., A. O. Mooers, and P. H. Harvey, 1992. Tempo and mode of evolution revealed from  
656 molecular phylogenies. *Proceedings of the National Academy of Sciences* 89:8322–8326.
- 657 Ng, J. and S. D. Smith, 2014. How traits shape trees: new approaches for detecting  
658 character state-dependent lineage diversification. *Journal of Evolutionary Biology*  
659 27:2035–2045.
- 660 O’Meara, B. C. and J. M. Beaulieu, 2016. Past, future, and present of state-dependent  
661 models of diversification. *American Journal of Botany* 103:792–795.

- 662 O'Meara, B. C., S. D. Smith, W. S. Armbruster, L. D. Harder, C. R. Hardy, L. C.  
663 Hileman, L. Hufford, A. Litt, S. Magallón, S. A. Smith, P. F. Stevens, C. B. Fenster, and  
664 P. K. Diggle, 2016. Non-equilibrium dynamics and floral trait interactions shape extant  
665 angiosperm diversity. *Proceedings of the Royal Society B: Biological Sciences*  
666 283:20152304.
- 667 Onstein, R. E., 2019. Darwin's second 'abominable mystery': trait flexibility as the  
668 innovation leading to angiosperm diversity. *New Phytologist* P. nph.16294.
- 669 Pagel, M., 2020. Evolutionary trees can't reveal speciation and extinction rates. *Nature*  
670 580:461–462.
- 671 Phillimore, A. B. and T. D. Price, 2008. Density-Dependent Cladogenesis in Birds. *PLOS*  
672 *Biology* 6:e71. Publisher: Public Library of Science.
- 673 Ponciano, J. M., J. G. Burleigh, E. L. Braun, and M. L. Taper, 2012. Assessing Parameter  
674 Identifiability in Phylogenetic Models Using Data Cloning. *Systematic Biology*  
675 61:955–972.
- 676 Pulido-Santacruz, P. and J. T. Weir, 2016. Extinction as a driver of avian latitudinal  
677 diversity gradients: EXTINCTION AS A DRIVER OF DIVERSITY GRADIENTS.  
678 *Evolution* 70:860–872.
- 679 Quintero, I. and W. Jetz, 2018. Global elevational diversity and diversification of birds.  
680 *Nature* 555:246–250. Number: 7695 Publisher: Nature Publishing Group.
- 681 Rabosky, D. L., 2014. Automatic Detection of Key Innovations, Rate Shifts, and  
682 Diversity-Dependence on Phylogenetic Trees. *PLoS ONE* 9:e89543.
- 683 ———, 2017. Phylogenetic tests for evolutionary innovation: the problematic link between  
684 key innovations and exceptional diversification. *Philosophical Transactions of the Royal*  
685 *Society B: Biological Sciences* 372:20160417.

- 686 ———, 2020. Speciation rate and the diversity of fishes in freshwaters and the oceans.  
687 *Journal of Biogeography* 47:1207–1217.
- 688 Rabosky, D. L., J. Chang, P. O. Title, P. F. Cowman, L. Sallan, M. Friedman,  
689 K. Kaschner, C. Garilao, T. J. Near, M. Coll, and M. E. Alfaro, 2018. An inverse  
690 latitudinal gradient in speciation rate for marine fishes. *Nature* 559:392–395. Number:  
691 7714 Publisher: Nature Publishing Group.
- 692 Rabosky, D. L. and E. E. Goldberg, 2015. Model Inadequacy and Mistaken Inferences of  
693 Trait-Dependent Speciation. *Systematic Biology* 64:340–355.
- 694 Rabosky, D. L. and I. J. Lovette, 2008. Explosive evolutionary radiations: decreasing  
695 speciation or increasing extinction through time? *Evolution; International Journal of*  
696 *Organic Evolution* 62:1866–1875.
- 697 Rannala, B., 2002. Identifiability of parameters in MCMC Bayesian inference of phylogeny.  
698 *Systematic Biology* 51:754–760.
- 699 Ricklefs, R. E., 2007. Estimating diversification rates from phylogenetic information.  
700 *Trends in Ecology & Evolution* 22:601–610.
- 701 Rolland, J., F. L. Condamine, F. Jiguet, and H. Morlon, 2014. Faster Speciation and  
702 Reduced Extinction in the Tropics Contribute to the Mammalian Latitudinal Diversity  
703 Gradient. *PLOS Biology* 12:e1001775. Publisher: Public Library of Science.
- 704 Sauquet, H., 2013. A practical guide to molecular dating. *Comptes Rendus Palevol*  
705 12:355–367.
- 706 Silvestro, D., R. C. M. Warnock, A. Gavryushkina, and T. Stadler, 2018. Closing the gap  
707 between palaeontological and neontological speciation and extinction rate estimates.  
708 *Nature Communications* 9:5237. Number: 1 Publisher: Nature Publishing Group.
- 709 Silvestro, D., G. Zizka, and K. Schulte, 2014. Disentangling the Effects of Key Innovations

- 710 on the Diversification of Bromelioideae (bromeliaceae). *Evolution* 68:163–175. *eprint*:  
711 <https://onlinelibrary.wiley.com/doi/pdf/10.1111/evo.12236>.
- 712 Slater, G. J., S. A. Price, F. Santini, and M. E. Alfaro, 2010. Diversity versus disparity  
713 and the radiation of modern cetaceans. *Proceedings of the Royal Society B: Biological*  
714 *Sciences* 277:3097–3104. Publisher: Royal Society.
- 715 Smith, S. A. and J. W. Brown, 2018. Constructing a broadly inclusive seed plant  
716 phylogeny. *American Journal of Botany* 105:302–314. *eprint*:  
717 <https://bsapubs.onlinelibrary.wiley.com/doi/pdf/10.1002/ajb2.1019>.
- 718 Soltis, P. S., R. A. Folk, and D. E. Soltis, 2019. Darwin review: angiosperm phylogeny and  
719 evolutionary radiations. *Proceedings of the Royal Society B: Biological Sciences*  
720 286:20190099.
- 721 Upham, N. S., J. A. Esselstyn, and W. Jetz, 2019. Inferring the mammal tree: Species-level  
722 sets of phylogenies for questions in ecology, evolution, and conservation. *PLOS Biology*  
723 17:e3000494.
- 724 Vamosi, J. C., S. Magallón, I. Mayrose, S. P. Otto, and H. Sauquet, 2018.  
725 Macroevolutionary Patterns of Flowering Plant Speciation and Extinction. *Annual*  
726 *Review of Plant Biology* 69:685–706.
- 727 Whitlock, M. C. and N. H. Barton, 1997. The Effective Size of a Subdivided Population.  
728 *Genetics* 146:427–441. Publisher: Genetics Section: Investigations.
- 729 Zenil-Ferguson, R., J. G. Burleigh, W. A. Freyman, B. Igić, I. Mayrose, and E. E.  
730 Goldberg, 2019. Interaction among ploidy, breeding system and lineage diversification.  
731 *New Phytologist* 224:1252–1265.

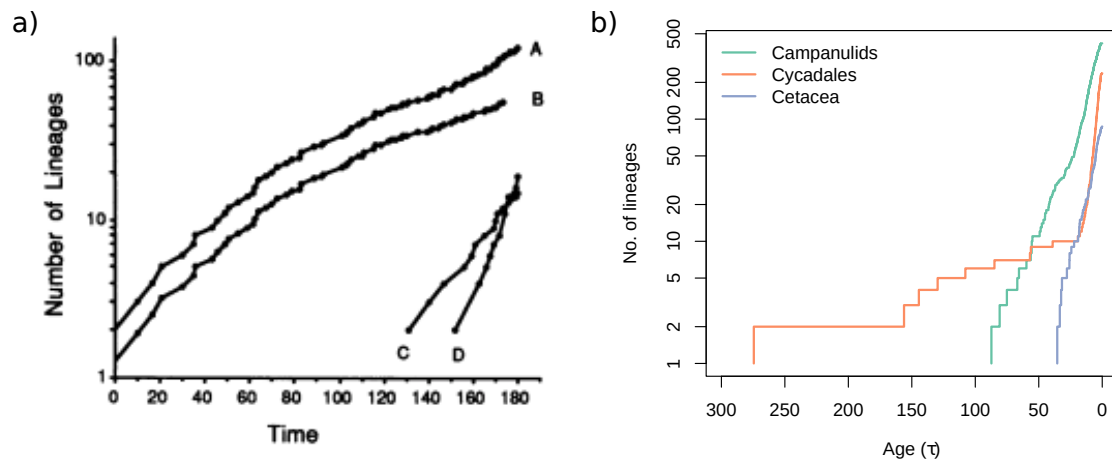

Fig. 1. (a) The first example of a lineage through time plot (LTT), taken from Nee et al. (1992) and based on a phylogenetic tree of birds. On the y-axis is the number of lineages (log scale) and the x-axis is time since origin (present on the right hand side of the graph). "Each point corresponds to a change in the number of lineages. Line A, the pattern of origination of all 122 lineages; line B, same as A, but without the Passeri (line C) and the Ciconiiformes (line D). Line B has been shifted downward to aid visual comparison. The diversification rate is quantified by the steepness of the slope." In this panel, time is displayed going forward, from past to present as time since origin ( $t$ ). (b) Three LTTs from modern phylogenetic trees of Campanulids (Beaulieu and Donoghue, 2013), Cycadales (Condamine et al., 2015) and Cetacea (Slater et al., 2010). In this panel, time is read backwards, from present to past as an age ( $\tau$ ).



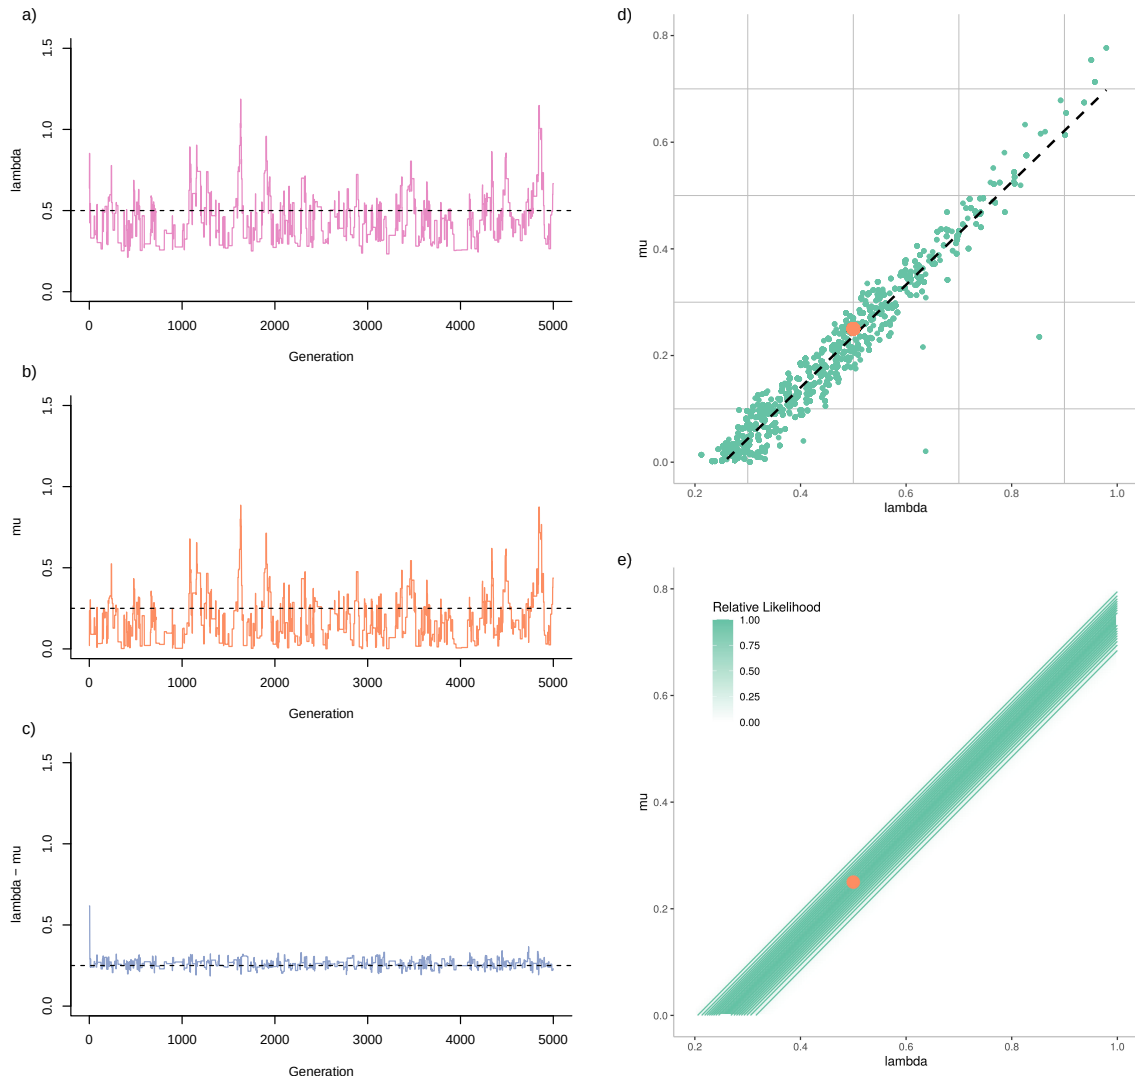

Fig. 2. An example of unidentifiability issues encountered when trying to estimate values of two parameters ( $\lambda$  &  $\mu$ ) for the slope  $\lambda - \mu$ . We used a Bayesian Monte-Carlo Markov Chain approach to try to estimate the values of  $\lambda$  and  $\mu$  separately. We ran a chain for 5000 generations, sampling each generation. The traces for (a)  $\lambda$  and (b)  $\mu$  show a great deal of uncertainty in the parameter estimates compared to the estimates for (c)  $\lambda - \mu$ . True values are shown as black dashed lines in panels (a-c) and as orange circles in panels (d-e). We plotted  $\lambda$  against  $\mu$  and found that they two parameters were highly correlated (d). When then calculated the relative likelihood over a range of parameters values and found a flat ridge in the likelihood where different pairs of values for  $\lambda$  &  $\mu$  are equally likely - or unidentifiability (e).

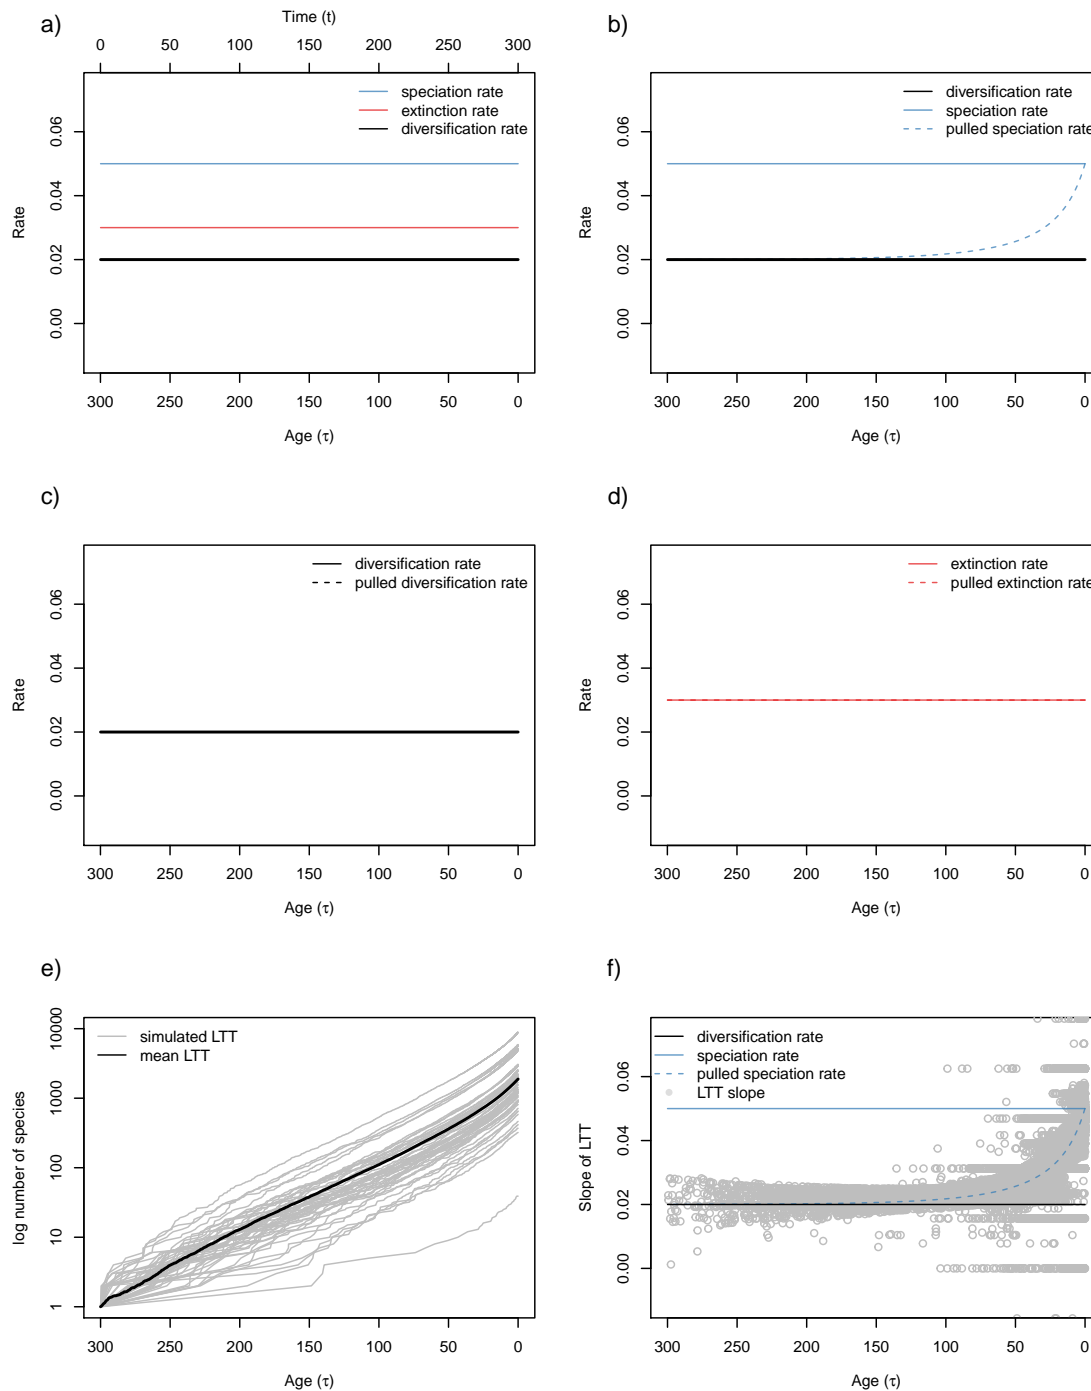

Fig. 3. A simple example of the relationship between constant diversification rates and corresponding pulled rates. Panel (a) shows values of speciation rate, extinction rate and diversification rate over time. An additional axis, at the top of panel (a) shows time going forward (t). Panel (b) shows how in the past, pulled speciation rate (PSR) is identical to the diversification rate (if sampling fraction = 1) while closer to the present PSR approaches speciation rate. The following two panels compare (c)  $r$  & pulled diversification rate (PDR) and (d) compares  $\mu$  & pulled extinction rate (PER). In these two cases the pulled rates are identical to the un-unpulled rates. Panel (e) shows 50 LTT plots (grey lines) simulated with the parameters used in panels (a-d) and the mean LTT (black line). Panel (f) shows the slopes of the LTTs in panel (e) over time, matching PSR and depicting the expected increase towards the present caused by the lack of effect of extinction - species do not have enough time to go extinct towards the present. An interactive version of this plot, in which parameters can be modified, can be found at [https://ajhelmstetter.shinyapps.io/pulled\\_rates/](https://ajhelmstetter.shinyapps.io/pulled_rates/).

REFERENCES

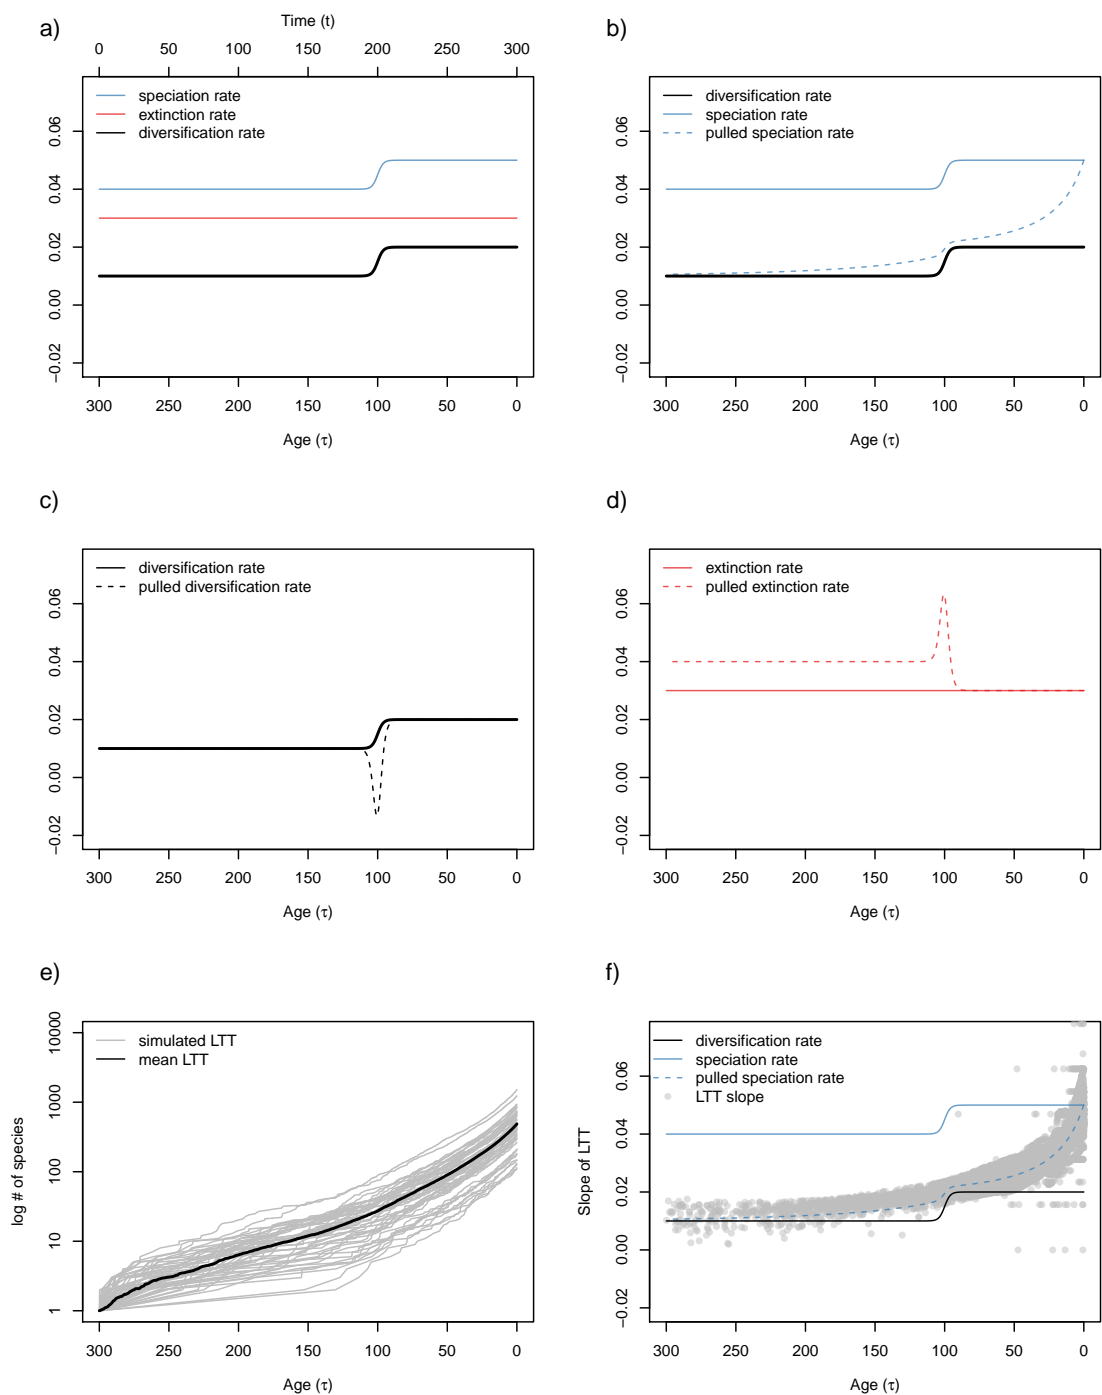

Fig. 4. A slightly more complex example of the relationship between constant diversification rates and corresponding pulled rates where a single shift - an increase in speciation rate - has taken place. Panel (a) shows values of speciation rate, extinction rate and diversification rate over time. An additional axis, at the top of panel (a) shows time going forward ( $t$ ). Panel (b) shows the gradual change in PSR during the shift in speciation rate. Panel (c) compares  $r$  and pulled diversification rate (PDR). The sudden increase in speciation rate causes PDR to decrease suddenly before recovering to the new diversification rate. Panel (d) compares extinction rate and pulled extinction rate (PER) and shows an inverse pattern to panel (c). Panel (e) shows 50 LTT plots (grey lines) simulated with the parameters used in panels (a-d) and the mean LTT (black line). Panel (f) shows the slopes of the LTTs in panel (e) over time, matching PSR and again depicting the expected increase towards the present caused by the lack of effect of extinction.

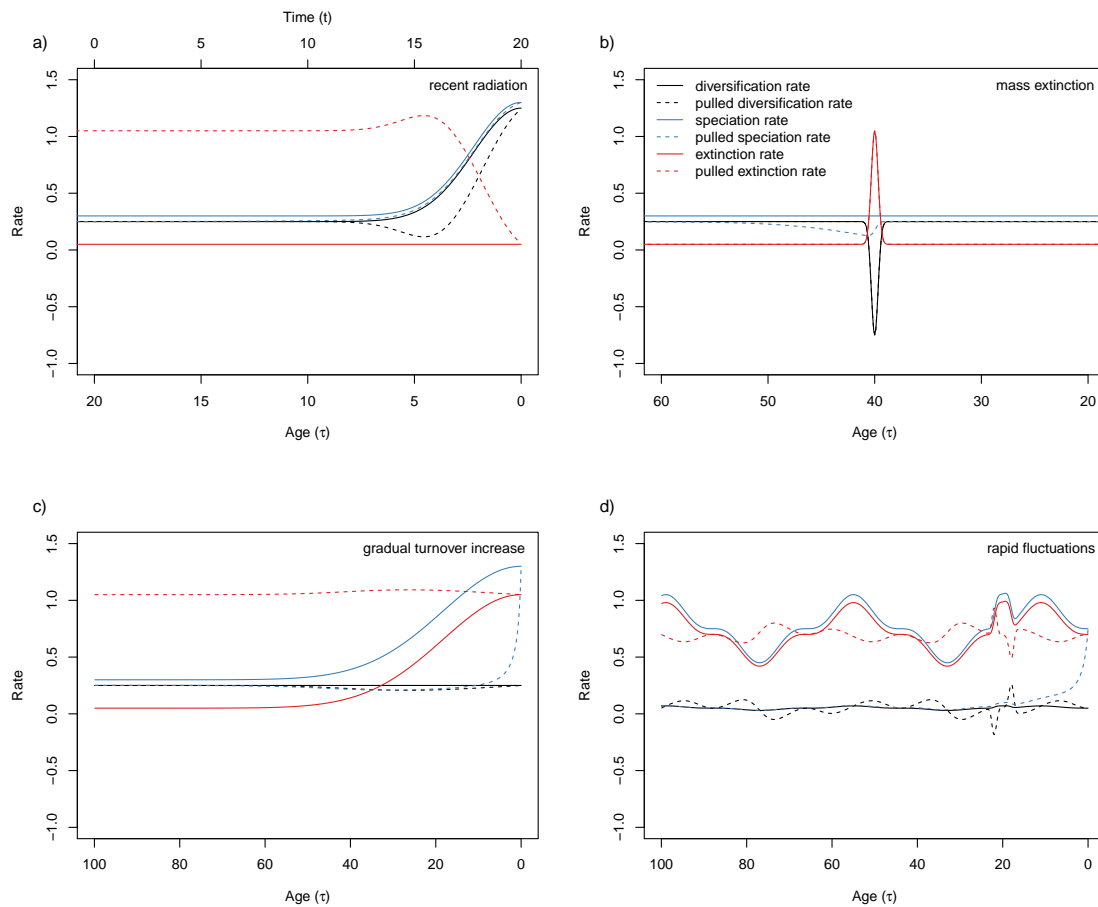

Fig. 5. Comparison of diversification rate and pulled diversification rate (PDR) under three simulated diversification scenarios that are commonly investigated (a-c) and a final, more complex scenario. Speciation rate, pulled speciation rate and extinction rate are also shown. Panel (a) shows a recent radiation where diversification rate and speciation rate sharply increase towards the present. An additional axis, at the top of panel (a) shows time going forward ( $t$ ). Panel (b) shows a mass extinction event at 40 Ma in which extinction briefly but rapidly increases and then falls back to previous levels. Panel (c) shows a gradual increase in species turnover rate (both speciation and extinction increase slowly over time). Panel (d) shows a scenario where speciation and extinction rates are similar to each other but are in rapid fluctuation over time. This results in a relatively constant diversification rate and a rapidly fluctuating PDR that remains close to diversification rate ( $r$ ).
